## The added value of contrast-enhanced cardiac magnetic resonance to predict positive genetic testing in clinically suspected Lamin A/C cardiomyopathy

Delhommeau P.<sup>1</sup>; Marteau L.<sup>1</sup>; Kyndt F.<sup>1</sup>; Constant Dit Beauflis AL.<sup>1</sup>; Warin-Fresse K.<sup>2</sup>; Serfaty JM.<sup>2</sup>; Rousseau O.<sup>3</sup>; Karakachoff M.<sup>3</sup>; Conan E.<sup>1</sup>; Clero S.<sup>1</sup>; Le Tourneau T.<sup>1</sup>; Thollet A.<sup>1</sup>; Trochu JN.<sup>1</sup>; Probst V.<sup>1</sup>; Piriou N.<sup>4</sup>

<sup>1</sup>Institut du thorax, University Hospital of Nantes, Nantes, France

<sup>2</sup>University Hospital of Nantes, Cardiac and vascular radiology, Nantes, France

<sup>3</sup>University Hospital of Nantes, Santé Publique, Clinique des données, Nantes, France

<sup>4</sup>University Hospital of Nantes, Institut du thorax and Nuclear Medicine Department, Nantes, France

**Funding Acknowledgements:** Type of funding sources: None.

**Background:** Lamin A/C cardiomyopathy (CM) is an inherited disease due to LMNA gene mutation with particular phenotype that associates conduction disorders, frequent atrial fibrillation and life-threatening ventricular arrhythmias, with normal or altered ventricular systolic function. Cardiac magnetic resonance (CMR) studies suggest frequent late gadolinium enhancement (LGE) involving septal mid-myocardium.

**Aims:** To assess the added value of CMR to conventional clinical features of Lamin A/C CM for the prediction of a positive LMNA gene testing.

**Methods:** We performed a retrospective monocentric study in all index patients referred for genetic testing for a clinical suspicion of Lamin A/C CM. Clinical, ECG and imaging data including CMR at time of genetic testing in patients with a positive test (LMNA+) and patients without (LMNA-) were compared. The diagnostic performances of relevant parameters for the prediction of a positive LMNA gene testing were analyzed in several logistic regression models.

**Results:** 90 patients were included (55 LMNA+, 35 LMNA-). 49% had significant left ventricular (LV) dilatation on echocardiography, 57% had a LV ejection fraction (LVEF) < 50%, 46% had a significant left atrial dilatation, and 17% had right ventricular dysfunction. None of these parameters were different comparing LMNA+ and LMNA- patients. LMNA+ patients had significantly more frequent familial history of sudden cardiac death (SCD) or CM. There were no significant differences between LMNA+ and LMNA- patients in terms of conduction disorders, ventricular and supra-ventricular arrhythmias. The only significant difference on ECG was a more frequent abnormal R-wave progression in V1-V3 in LMNA+ patients (87.8% vs 39.4%,  $p < 0.001$ ). 55 patients had a CMR (28/55 LMNA+, 27/35 LMNA-). The main reason for not performing CMR was the presence of cardiac implantable electronic device. LMNA+ patients had significantly more LGE than LMNA- (20/28 (71%) vs 9/27 (33%),  $p = 0.011$ ). The main differences in LGE features between the 2 groups were septal involvement (70% in LMNA+ vs 11% in LMNA-,  $p = 0.005$ ) and mid-myocardium localization (95% vs 44%,  $p = 0.005$ ). In a first logistic regression model without CMR data in all 90 patients, V1-V3 R-wave abnormalities, familial history of SCD and sinus node dysfunction were independent predictors of a positive LMNA gene testing (Sensitivity 89%, specificity 46%, accuracy 72%). A second model in the 55 patients who had a CMR showed better accuracy (85%), mainly driven by increased specificity (81%) with preserved sensitivity (89%). V1-V3 R-wave abnormalities, premature ventricular contractions, non-depressed LVEF and septal LGE predicted positive LMNA gene testing in this model (Septal LGE OR = 31, 95%CI 4-715;  $p = 0.005$ ).

**Conclusion:** CMR, particularly septal mid-myocardium LGE, carries good diagnostic accuracy to predict a positive LMNA gene testing in clinically suspected Lamin A/C CM with increased specificity when added to conventional red flags.

Abstract Figure. Logistic regression models performances

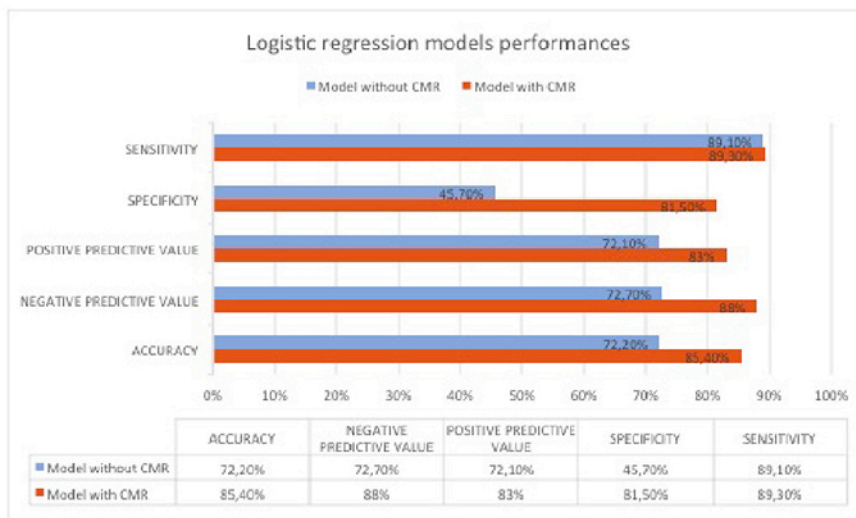

Source: http://academic.oup.com/ehjcimaging/article-pdf/22/Supplement_1/jeaa356.395/36214680/jeaa356.395.pdf
